# Supplementary material for: Synthesis and Evaluation of Antioxidant Properties of 2-Substituted Quinazolin-4(3H)-ones
Source: MDPI journal article supplement (doi:10.3390/molecules26216585), 2021-10-30
Supplement: s1 [file s1]

*Supplementary material on:*

# Synthesis and evaluation of antioxidant properties of 2-substituted quinazolin-4(3*H*)-ones

Janez Mravljak <sup>1</sup>, Lara Slavec <sup>1</sup>, Martina Hrast <sup>1</sup> and Matej Sova <sup>1,\*</sup>

<sup>1</sup> University of Ljubljana, Faculty of Pharmacy, Aškerčeva 7, SI 1000 Ljubljana, Slovenia; janez.mravljak@ffa.uni-lj.si; martina.hrast@ffa.uni-lj.si

\* Correspondence: matej.sova@ffa.uni-lj.si; Tel: +386-1-4769556

## TABLE OF CONTENTS

|                 |    |
|-----------------|----|
| Figures .....   | 2  |
| Figure S1 ..... | 2  |
| Figure S2.....  | 3  |
| Figure S3.....  | 4  |
| Figure S4.....  | 5  |
| Figure S5.....  | 6  |
| Figure S6.....  | 7  |
| Figure S7.....  | 8  |
| Figure S8.....  | 9  |
| Figure S9.....  | 10 |
| Figure S10..... | 11 |
| Figure S11..... | 12 |
| Figure S12..... | 13 |
| Figure S13..... | 14 |
| Figure S14..... | 15 |
| Figure S15..... | 16 |
| Figure S16..... | 17 |

## Figures

(a)

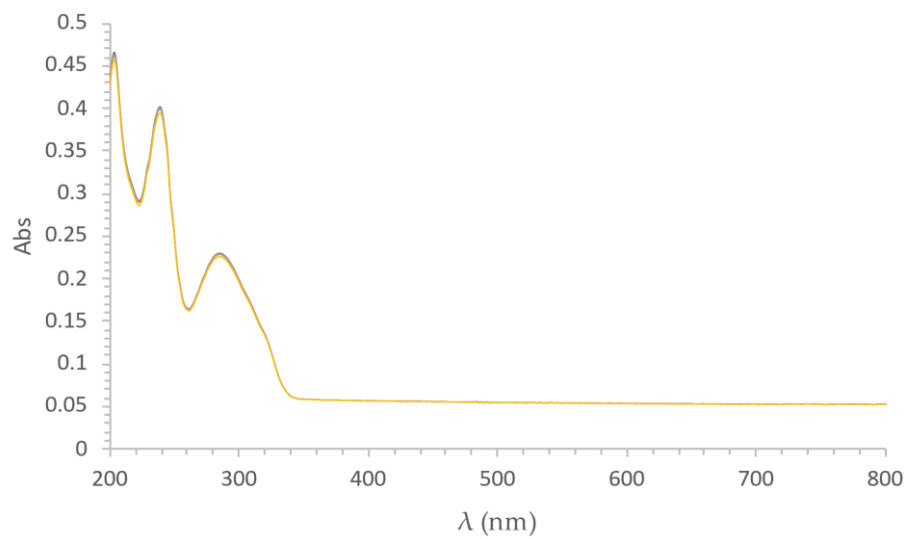

(b)

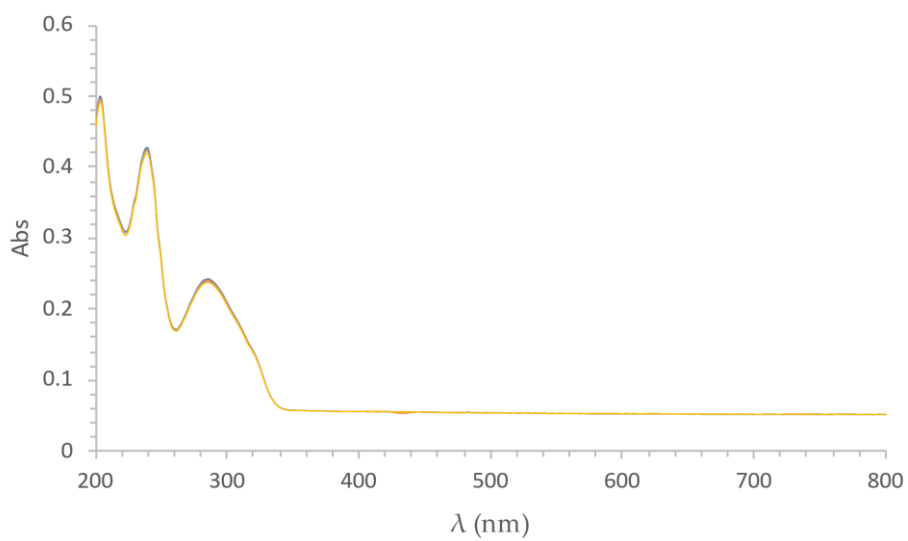

**Figure S1.** Spectrophotometric titration of 10  $\mu\text{M}$  **21a** with  $\text{Cu}^{2+}$  (a) and  $\text{Fe}^{2+}$  (b) (0 (blue), 5 (orange), 10 (gray), 20 (ocher)  $\mu\text{M}$ ) in 20 mM KPB buffer, pH 7.2, 25  $^{\circ}\text{C}$ ).

(a)

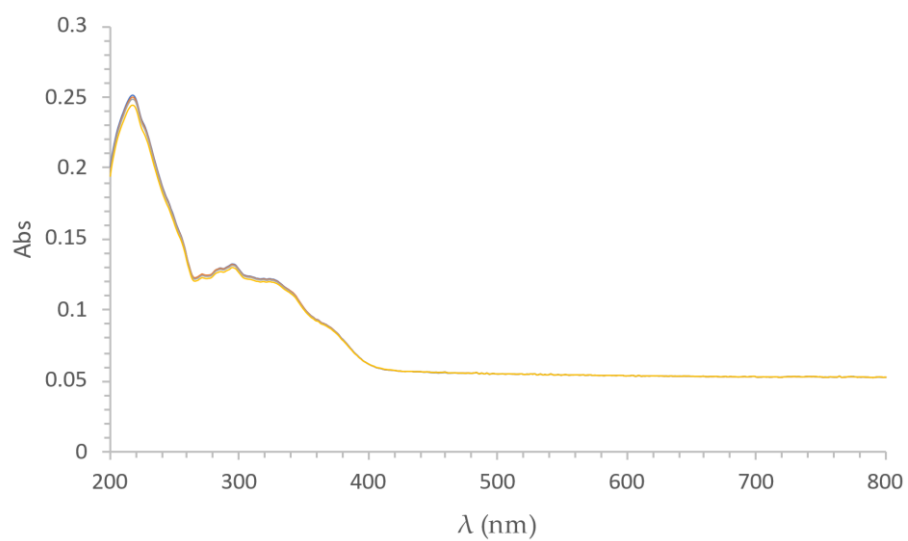

(b)

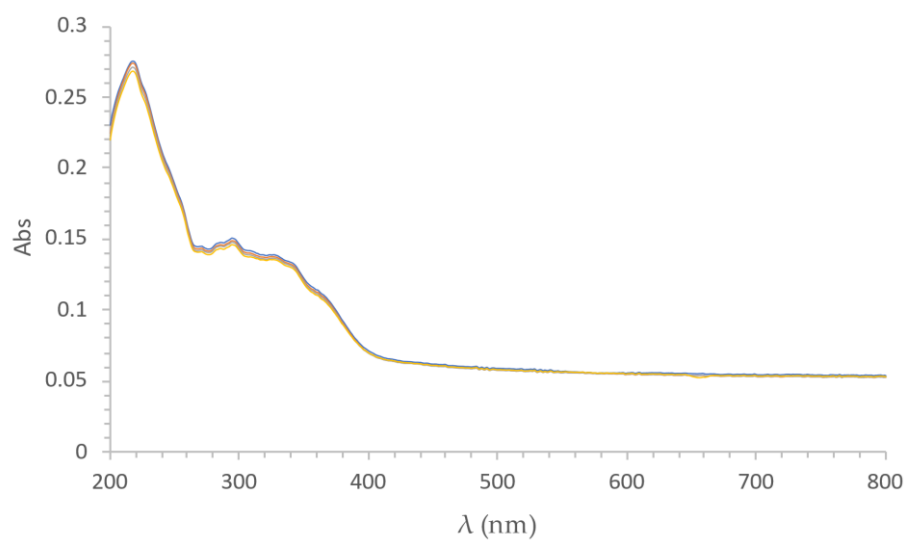

**Figure S2.** Spectrophotometric titration of 10  $\mu\text{M}$  **21b** with  $\text{Cu}^{2+}$  (a) and  $\text{Fe}^{2+}$  (b) (0 (blue), 5 (orange), 10 (gray), 20 (ocher)  $\mu\text{M}$ ) in 20 mM KPB buffer, pH 7.2, 25  $^{\circ}\text{C}$ ).

(a)

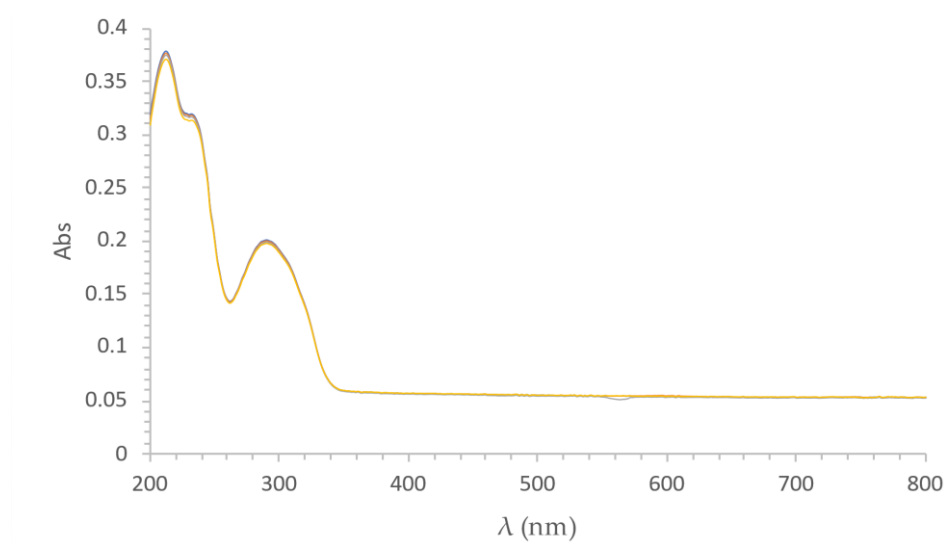

(b)

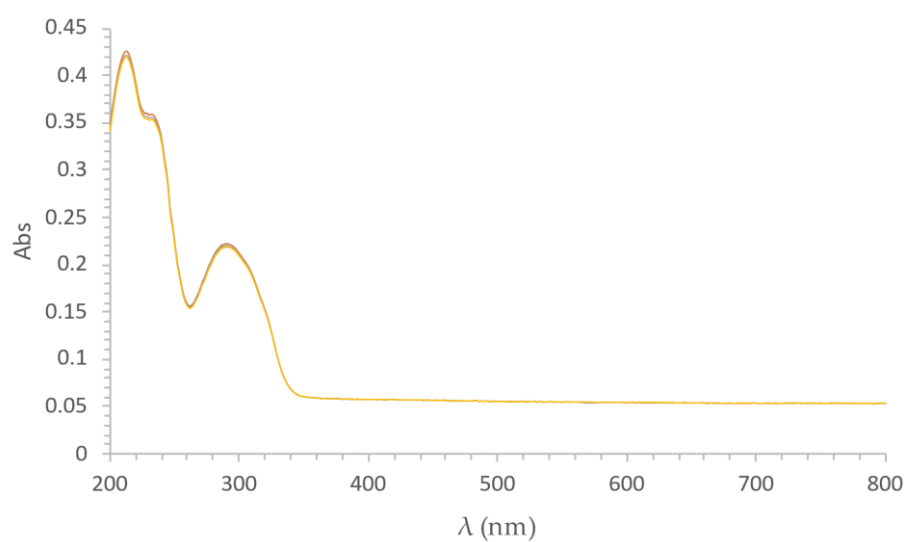

**Figure S3.** Spectrophotometric titration of 10  $\mu\text{M}$  **21c** with  $\text{Cu}^{2+}$  (a) and  $\text{Fe}^{2+}$  (b) (0 (blue), 5 (orange), 10 (gray), 20 (ocher)  $\mu\text{M}$ ) in 20 mM KPB buffer, pH 7.2, 25  $^{\circ}\text{C}$ ).

(a)

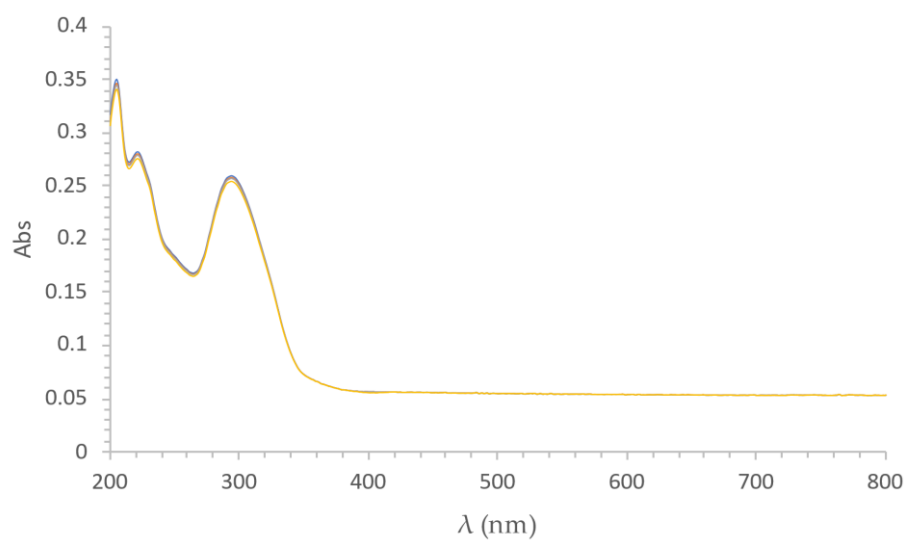

(b)

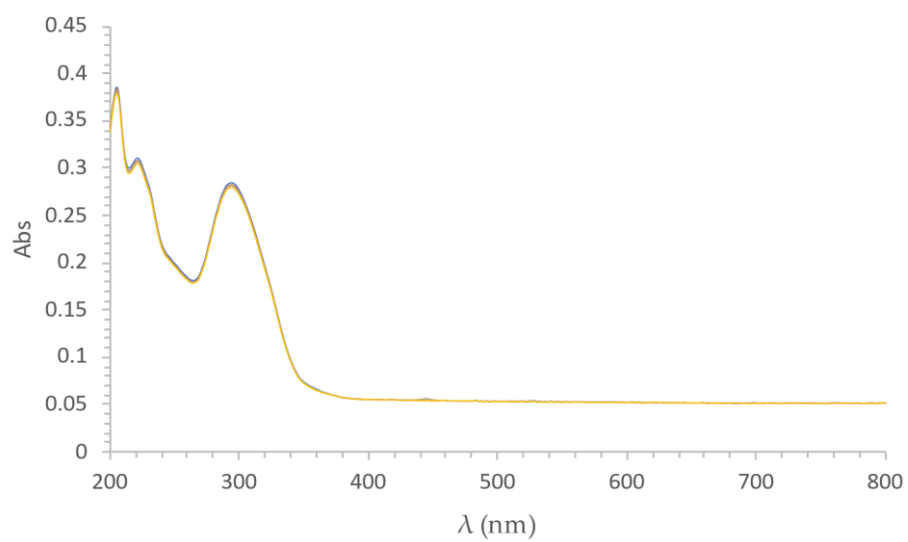

**Figure S4.** Spectrophotometric titration of 10  $\mu\text{M}$  **21d** with  $\text{Cu}^{2+}$  (a) and  $\text{Fe}^{2+}$  (b) (0 (blue), 5 (orange), 10 (gray), 20 (black)  $\mu\text{M}$ ) in 20 mM KPB buffer, pH 7.2, 25  $^{\circ}\text{C}$ ).

(a)

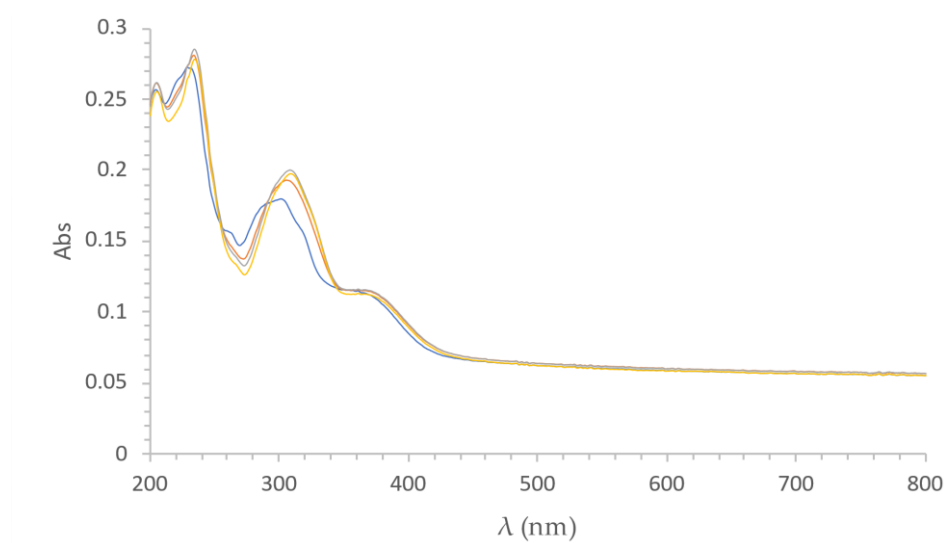

(b)

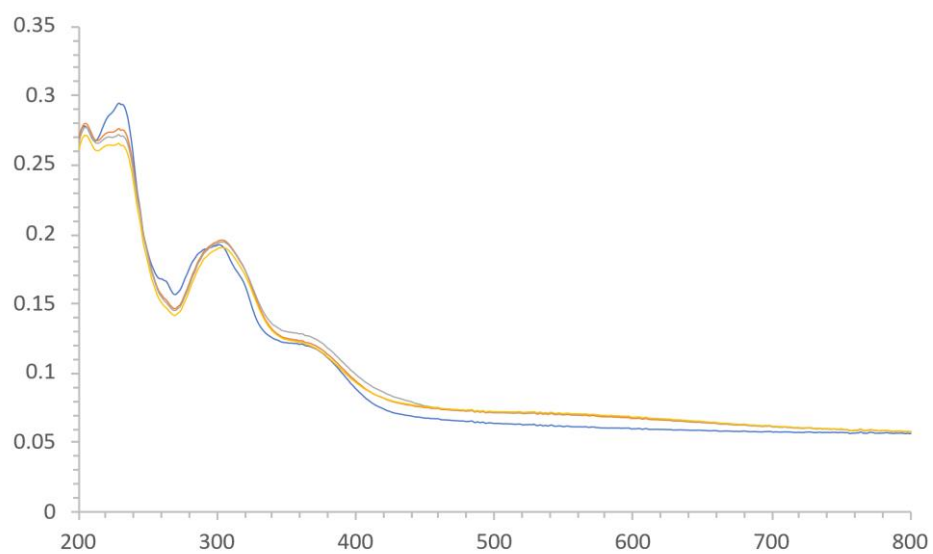

**Figure S5.** Spectrophotometric titration of 10  $\mu\text{M}$  **21e** with  $\text{Cu}^{2+}$  (a) and  $\text{Fe}^{2+}$  (b) (0 (blue), 5 (orange), 10 (gray), 20 (black)  $\mu\text{M}$ ) in 20 mM KPB buffer, pH 7.2, 25  $^{\circ}\text{C}$ ).

(a)

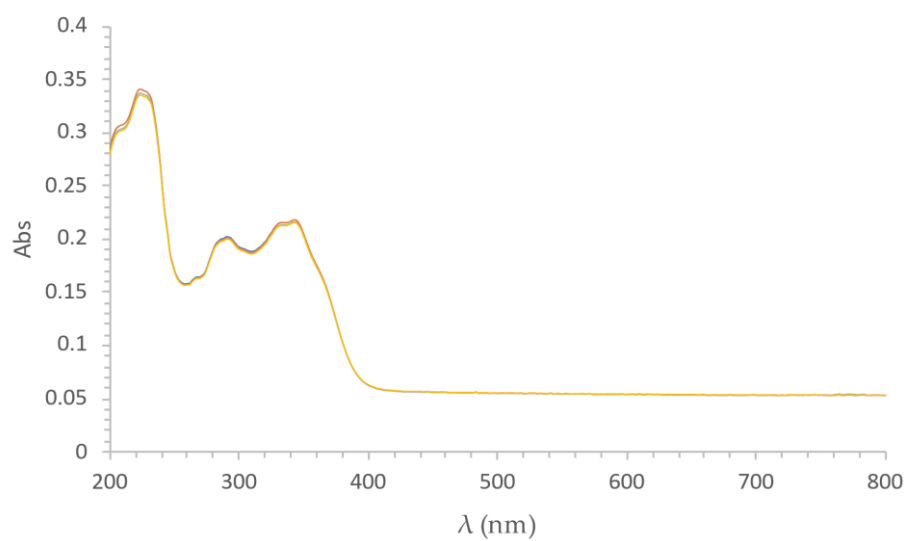

(b)

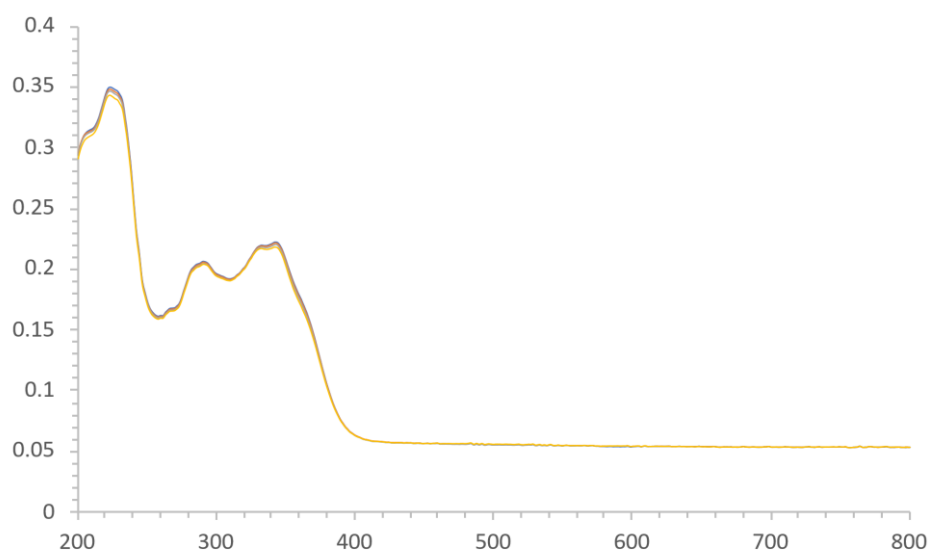

**Figure S6.** Spectrophotometric titration of 10  $\mu\text{M}$  21f with  $\text{Cu}^{2+}$  (a) and  $\text{Fe}^{2+}$  (b) (0 (blue), 5 (orange), 10 (gray), 20 (ocher)  $\mu\text{M}$ ) in 20 mM KPB buffer, pH 7.2, 25  $^{\circ}\text{C}$ ).

(a)

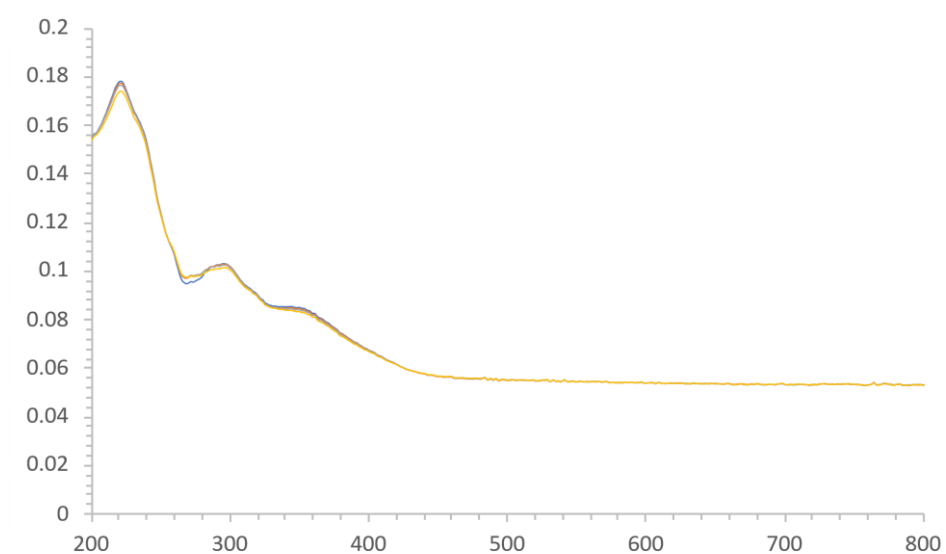

(b)

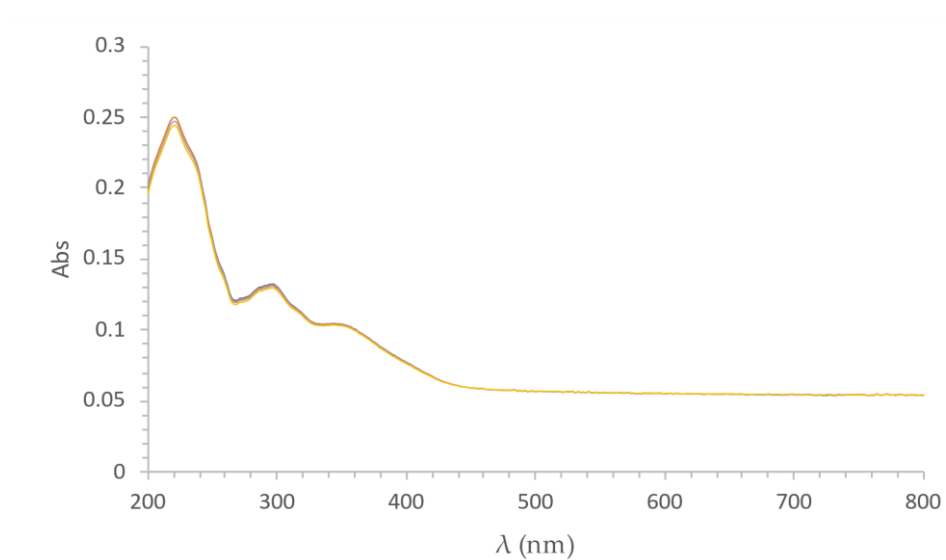

**Figure S7.** Spectrophotometric titration of 10  $\mu\text{M}$  **21g** with  $\text{Cu}^{2+}$  (a) and  $\text{Fe}^{2+}$  (b) (0 (blue), 5 (orange), 10 (gray), 20 (other)  $\mu\text{M}$ ) in 20 mM KPB buffer, pH 7.2, 25  $^{\circ}\text{C}$ ).



(a)

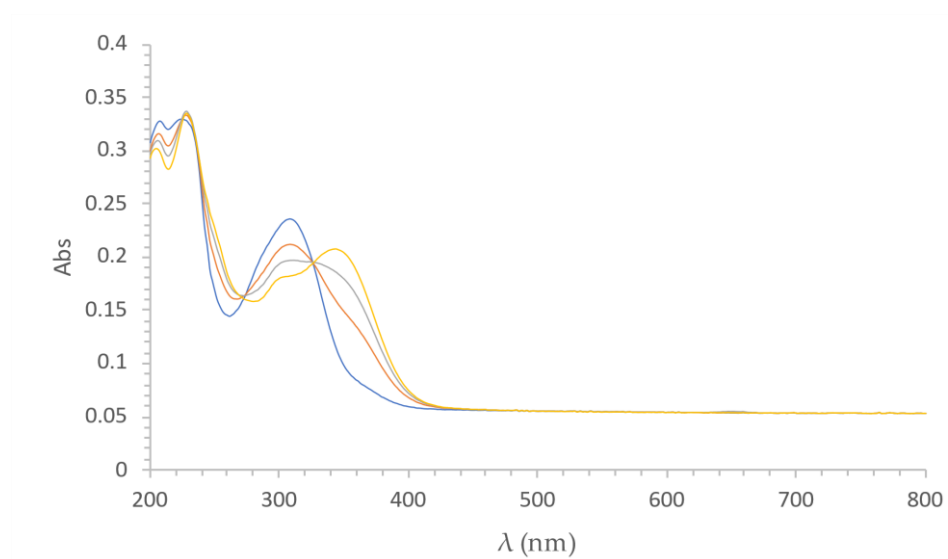

(b)

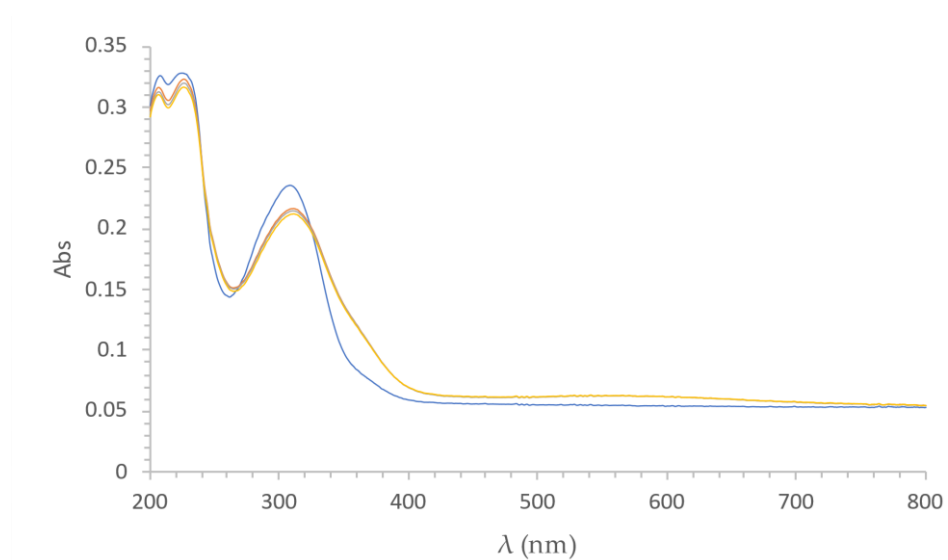

**Figure S8.** Spectrophotometric titration of 10  $\mu\text{M}$  **21h** with  $\text{Cu}^{2+}$  (a) and  $\text{Fe}^{2+}$  (b) (0 (blue), 5 (orange), 10 (gray), 20 (ocher)  $\mu\text{M}$ ) in 20 mM KPB buffer, pH 7.2, 25  $^{\circ}\text{C}$ ).

(a)

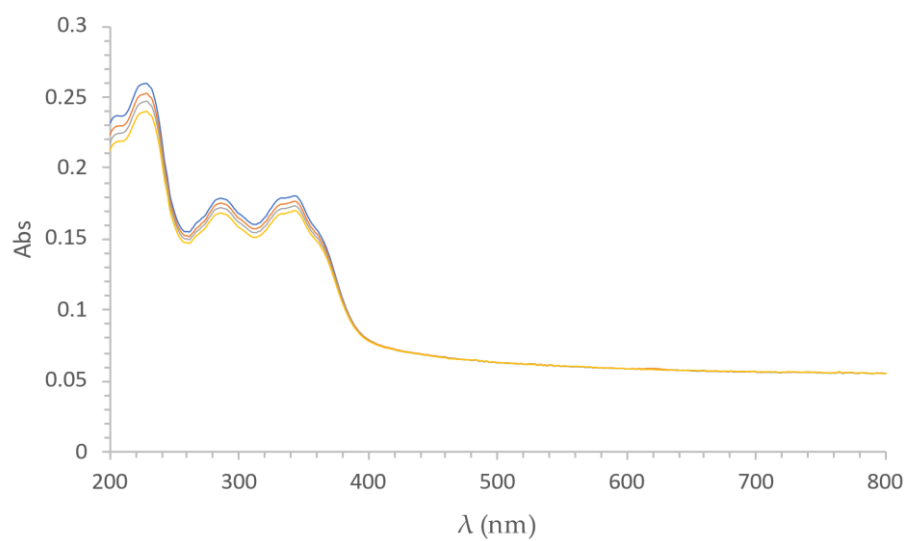

(b)

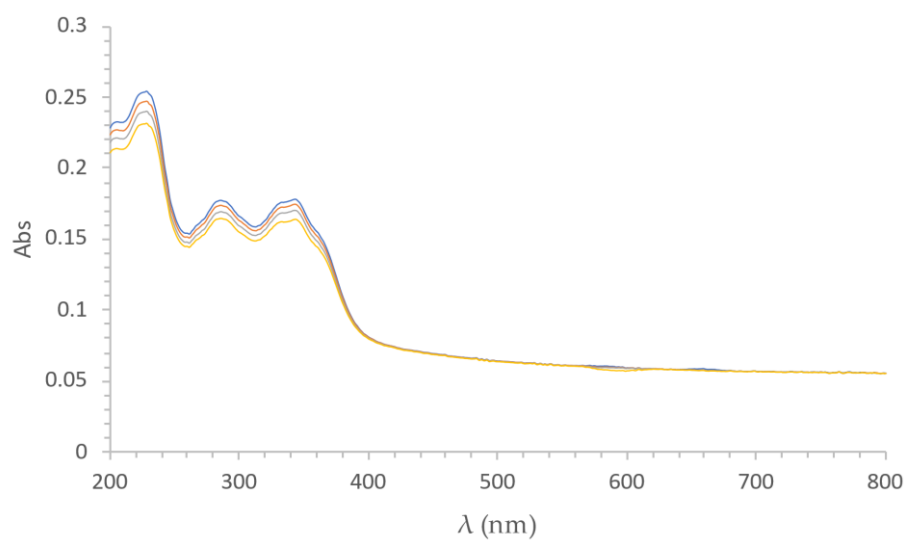

**Figure S9.** Spectrophotometric titration of 10  $\mu\text{M}$  **21i** with  $\text{Cu}^{2+}$  (a) and  $\text{Fe}^{2+}$  (b) (0 (blue), 5 (orange), 10 (gray), 20 (ocher)  $\mu\text{M}$ ) in 20 mM KPB buffer, pH 7.2, 25  $^{\circ}\text{C}$ ).

(a)

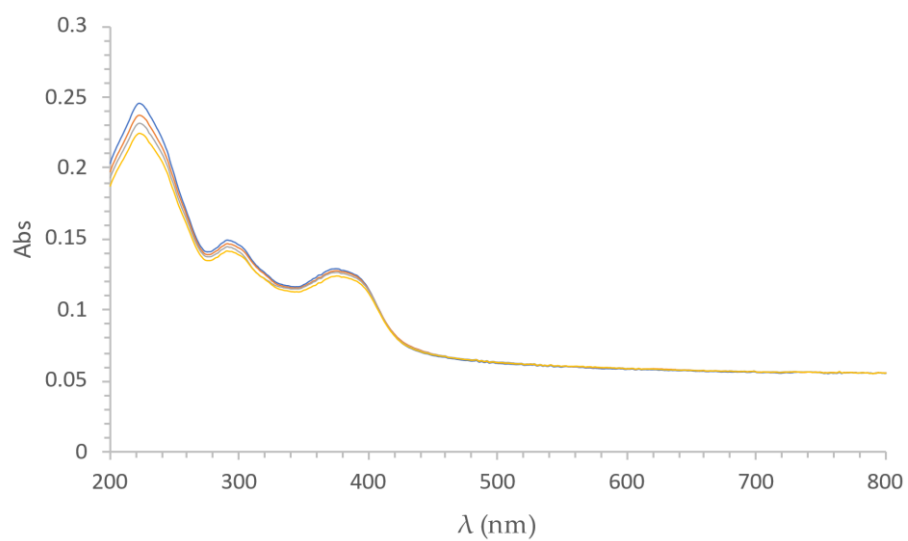

(b)

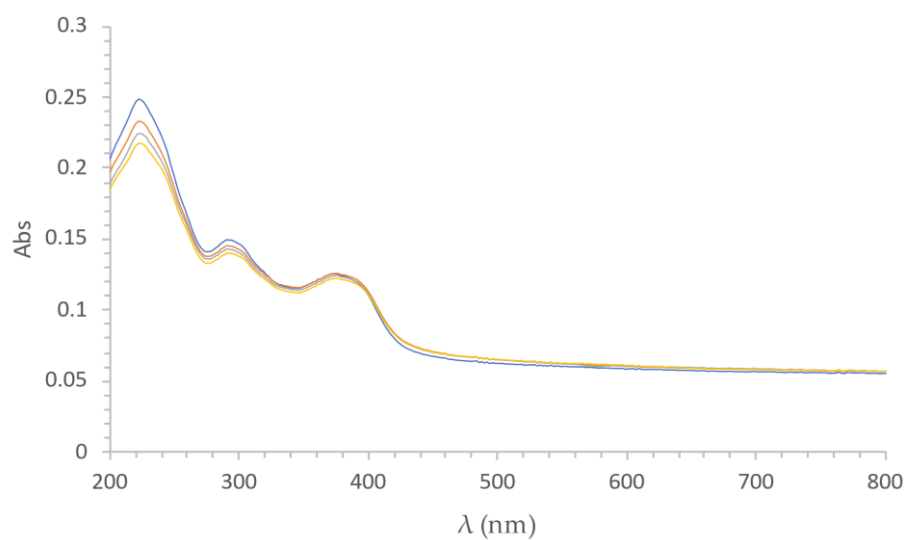

**Figure S10.** Spectrophotometric titration of 10  $\mu\text{M}$  **21j** with  $\text{Cu}^{2+}$  (a) and  $\text{Fe}^{2+}$  (b) (0 (blue), 5 (orange), 10 (gray), 20 (ocher)  $\mu\text{M}$ ) in 20 mM KPB buffer, pH 7.2, 25  $^{\circ}\text{C}$ ).

(a)

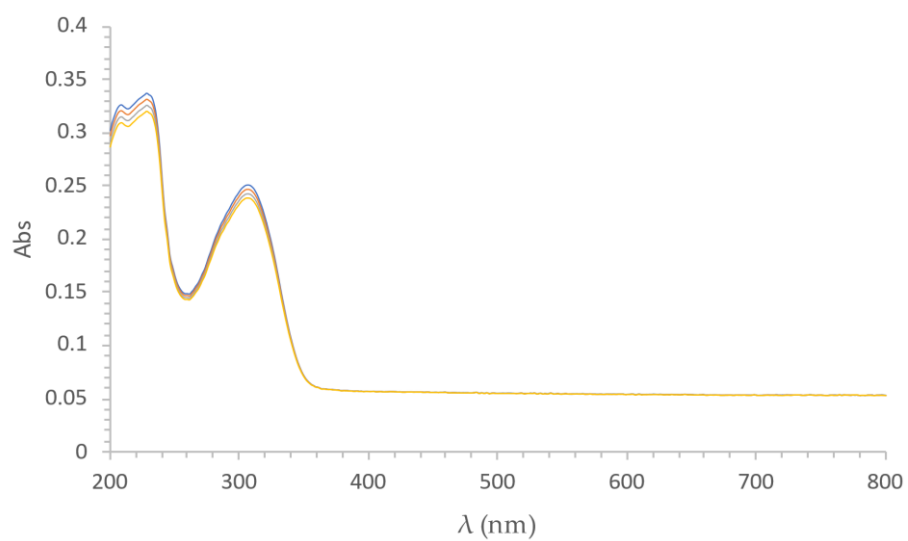

(b)

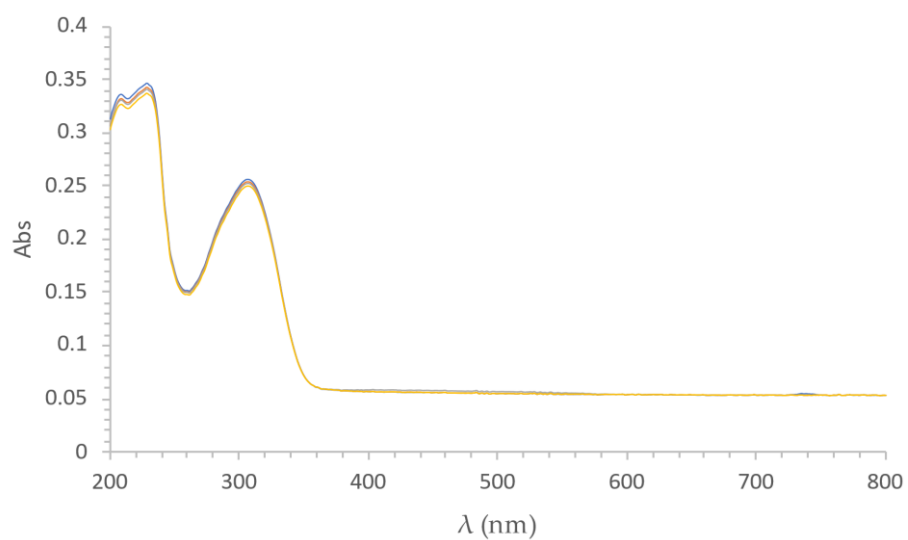

**Figure S11.** Spectrophotometric titration of 10  $\mu\text{M}$  **21k** with  $\text{Cu}^{2+}$  (a) and  $\text{Fe}^{2+}$  (b) (0 (blue), 5 (orange), 10 (gray), 20 (black)  $\mu\text{M}$ ) in 20 mM KPB buffer, pH 7.2, 25  $^{\circ}\text{C}$ ).

(a)

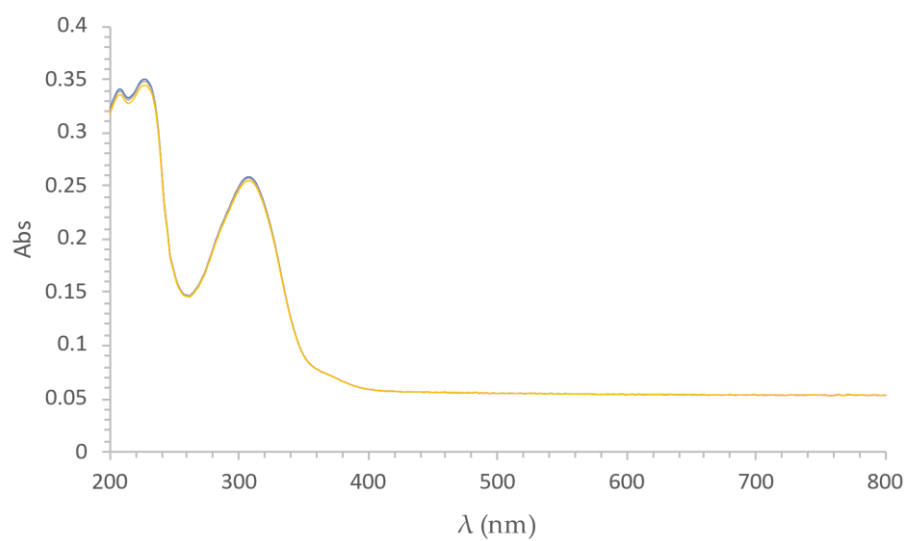

(b)

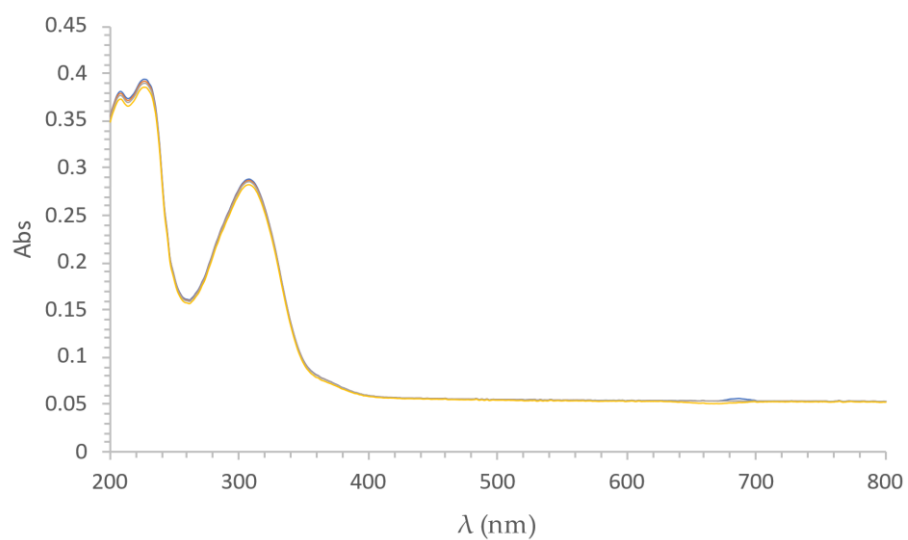

**Figure S12.** Spectrophotometric titration of 10  $\mu\text{M}$  **211** with  $\text{Cu}^{2+}$  (a) and  $\text{Fe}^{2+}$  (b) (0 (blue), 5 (orange), 10 (gray), 20 (other)  $\mu\text{M}$ ) in 20 mM KPB buffer, pH 7.2, 25  $^{\circ}\text{C}$ ).

(a)

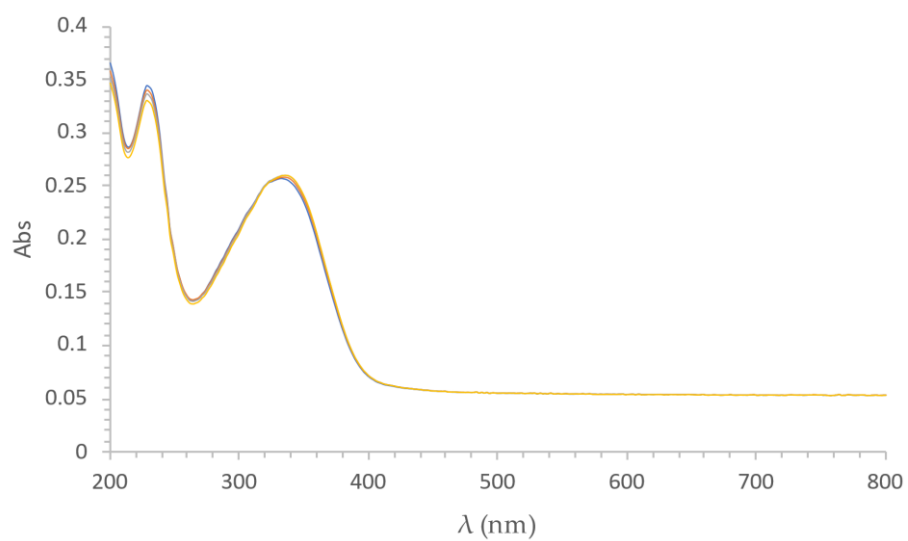

(b)

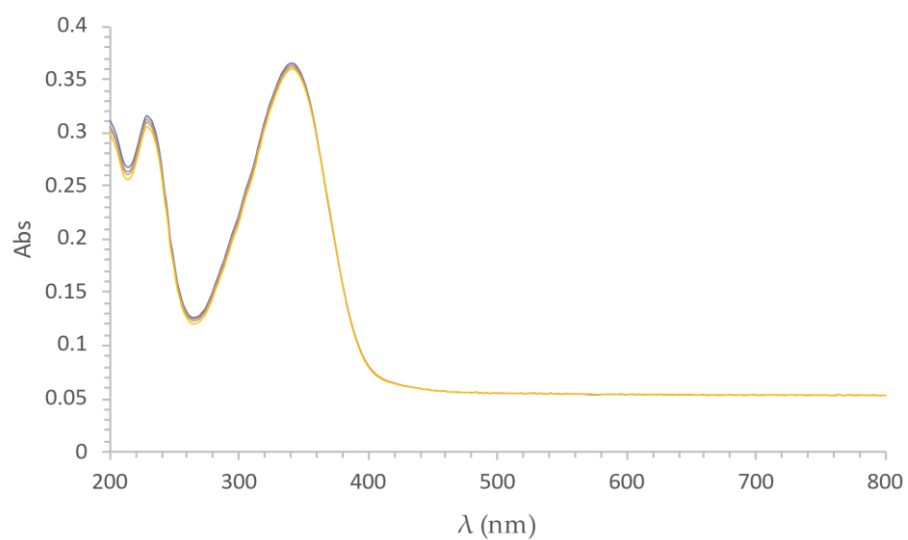

**Figure S13.** Spectrophotometric titration of 10  $\mu\text{M}$  **25a** with  $\text{Cu}^{2+}$  (a) and  $\text{Fe}^{2+}$  (b) (0 (blue), 5 (orange), 10 (gray), 20 (black)  $\mu\text{M}$ ) in 20 mM KPB buffer, pH 7.2, 25  $^{\circ}\text{C}$ ).

(a)

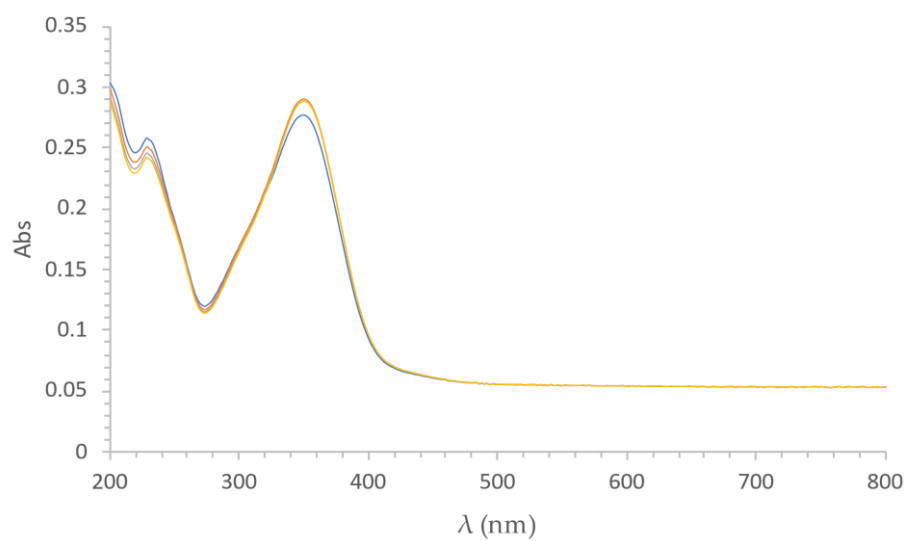

(b)

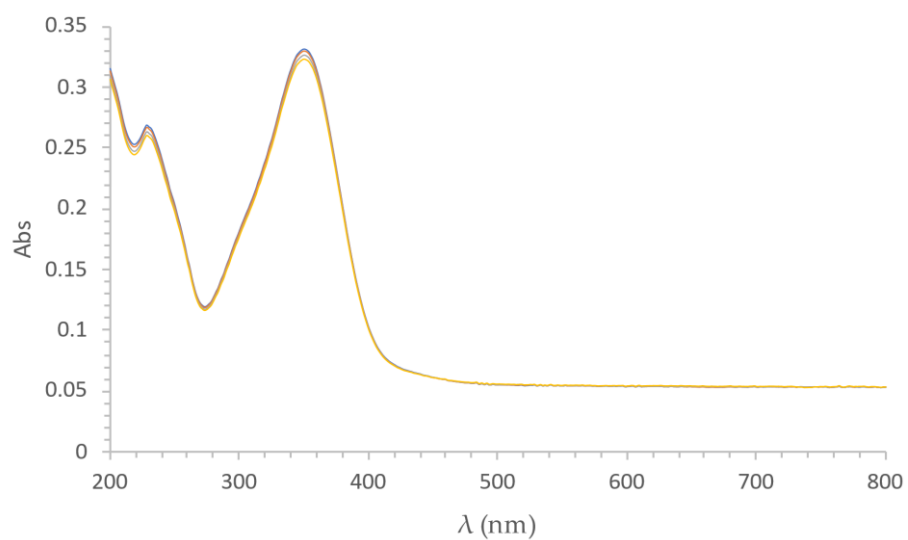

**Figure S14.** Spectrophotometric titration of 10  $\mu\text{M}$  **25b** with  $\text{Cu}^{2+}$  (a) and  $\text{Fe}^{2+}$  (b) (0 (blue), 5 (orange), 10 (gray), 20 (ocher)  $\mu\text{M}$ ) in 20 mM KPB buffer, pH 7.2, 25  $^{\circ}\text{C}$ ).

MLS-019Cu-2 #7-59 RT: 0.03-0.26 AV: 53 NL: 3.36E8  
T: FTMS + p ESI Full ms [100.0000-1000.0000]

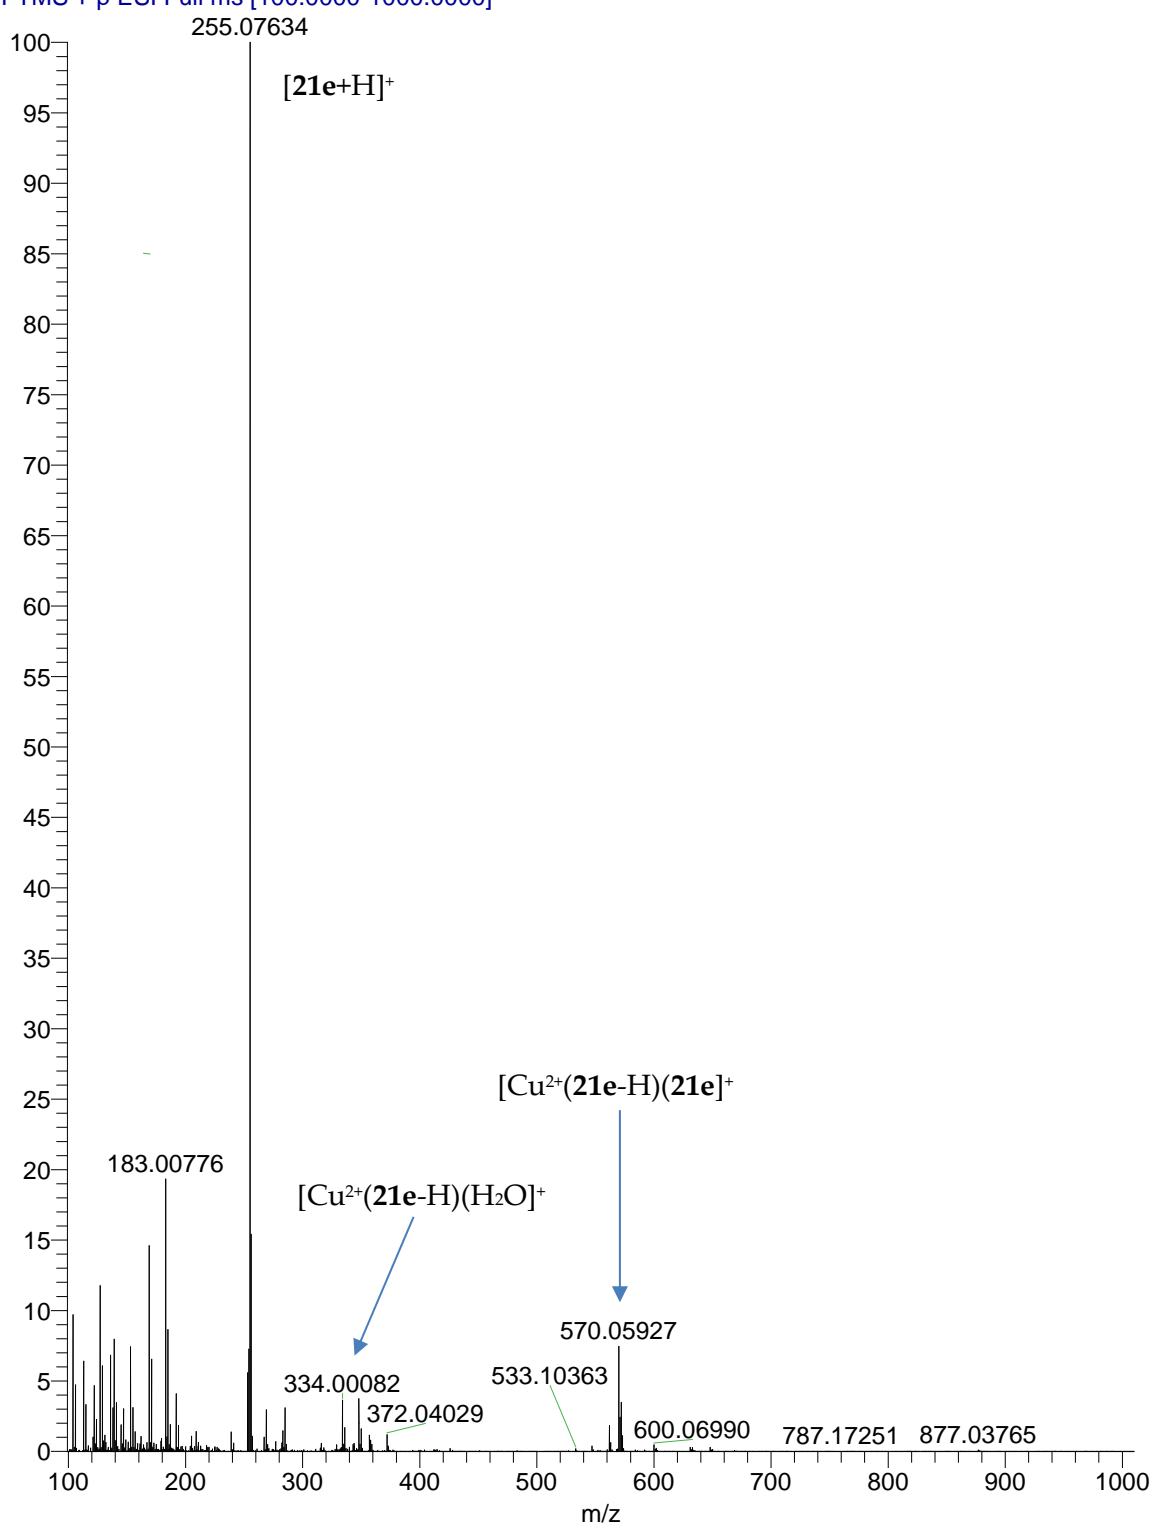

Figure S15. Electrospray mass spectrum of solution  $Cu^{2+}$  and **21e** (10  $\mu$ M each, 1 : 1) in methanol/water (1 : 1, v/v).



MLS-019Cu-2 #7-59 RT: 0.03-0.26 AV: 53 NL: 3.36E8  
T: FTMS + p ESI Full ms [100.0000-1000.0000]

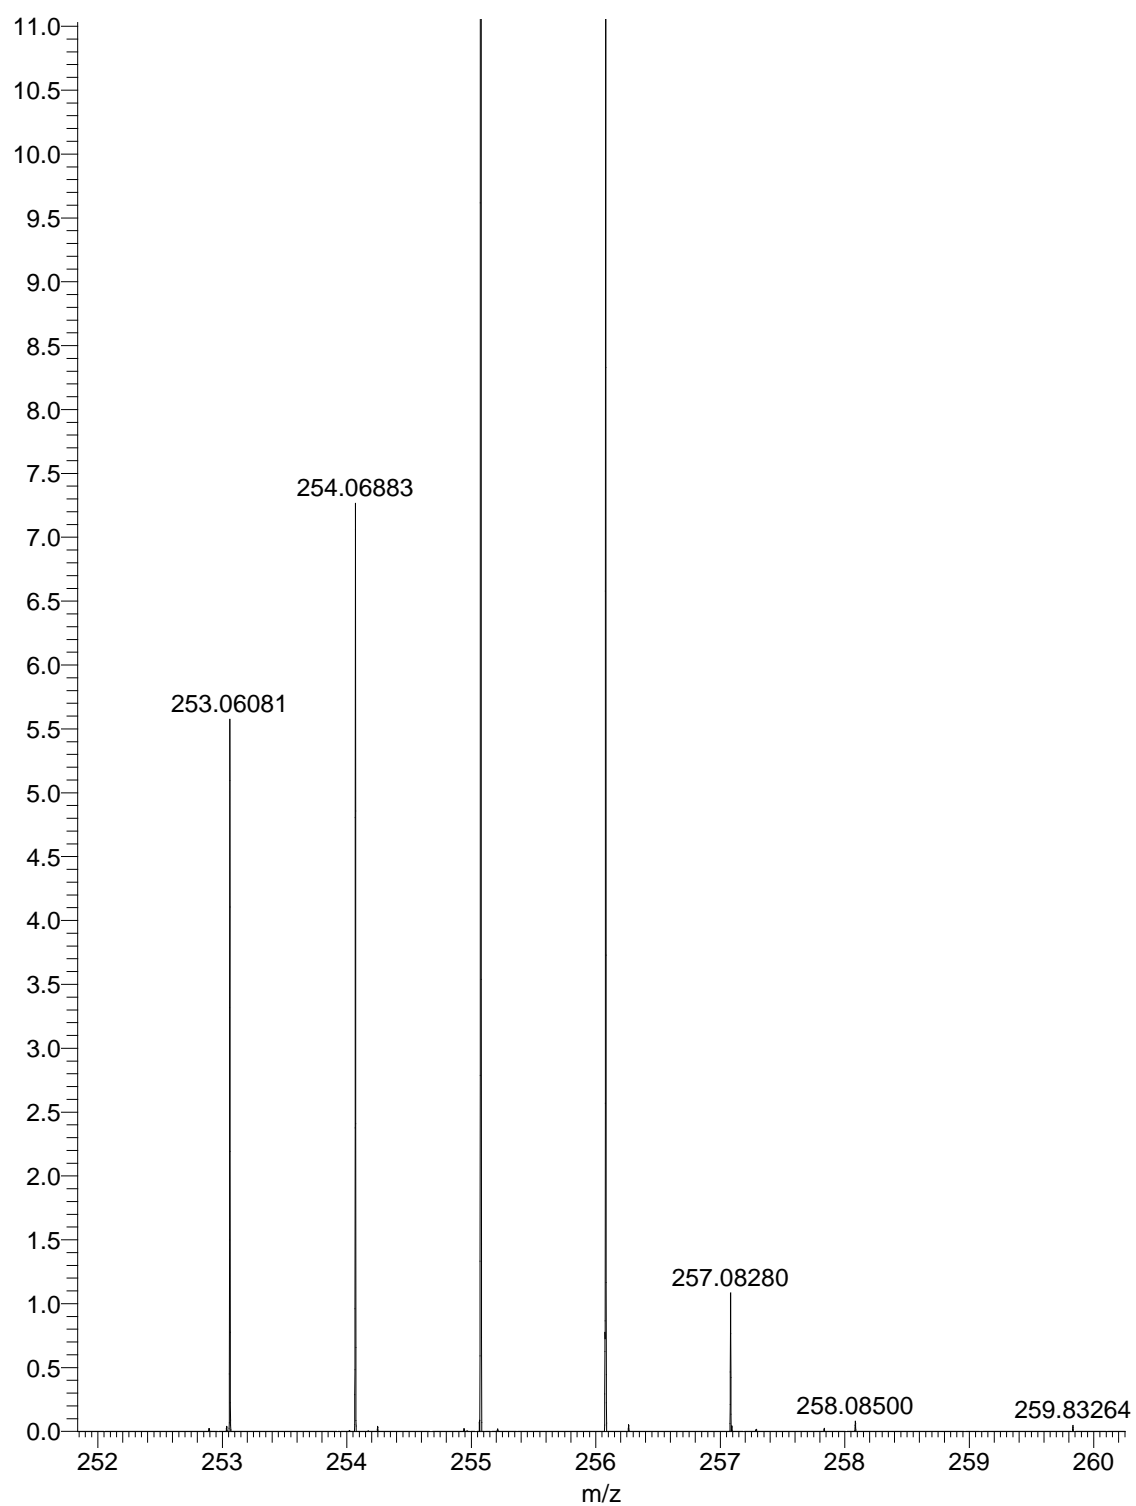

**Figure S16.** Electrospray mass spectrum of solution  $\text{Cu}^{2+}$  and **21e** (10  $\mu\text{M}$  each, 1 : 1) in methanol/water (1 : 1, v/v). Peak at  $m/z$  = 253 belongs to oxidised **21e** orthoquinone.
